# Supplementary material for: Cooperative effects in the complexation of anions and Lewis bases by a heteronuclear bifunctional Lewis acidElectronic supplementary information (ESI) available: synthetic and analytical results, including elemental analysis. See http://www.rsc.org/suppdata/cc/b2/b212127a/.
Source: Royal Society of Chemistry journal article supplement (doi:10.1039/b212127a), 2003-02-14
Supplement: b212127a.doc [file b212127a.doc]

Cooperative effects in the complexation of anions and Lewis bases by a heteronuclear bifunctional Lewis acid

James D. Hoefelmeyer and François P. Gabbaï*

Chemistry Department, Texas A&M University, 3255 TAMU, College Station, Texas 77843. Fax: +1 979 8454719; Tel: +1 979 862 2070; E-mail: francois@tamu.edu

**Experimental Section**

**General methods:** All experiments were carried out under a dry inert atmosphere of N2 using standard Schlenk technique or a glove box (Unilab, M. Braun). Tetraphenylphosphium halide salts were purchased from Aldrich and dried under vacuum prior to use. Acetonitrile was dried over CaH2 and distilled prior to use. 1,8- The microanalyses were performed by Atlantic Microlab, Norcross, GA. The melting points were measured on samples in sealed capillaries and are uncorrected.

**NMR spectroscopy:** NMR spectra were recorded on a Varian Unity Inova 400 FT NMR spectrometer (399.67 MHz for 1H, 149.04 MHz for 119Sn) by using internal deuterium lock. Chemical shifts ** are given in ppm, and are referenced against external Me4Si (1H, 13C) and Me4Sn (119Sn).

**Crystallography:** Due to the reactive nature of the compounds, the crystals were handled under a blanket of dry mineral oil during mounting. The crystals selected for data collection were mounted on a glass fiber with apiezon grease, and rapidly transferred into the cold N2 stream of the low-temperature accessory. Intensity data for the crystals were collected on a Siemens SMART CCD diffractometer at 110(2) K using graphite monochromated Mo‑K** radiation (** = 0.71073 Å) and 0.3º-wide **-scans with a crystal to detector distance of 5.0 cm. The structures were solved by direct method ([[1]](#endnote-2))and refined by full-matrix least-squares against *F2*([[2]](#endnote-3)). Crystallographic details can be found in the cif files that have been submitted as supplementary information.

**Synthesis of 2**: A suspension of **1** (50 mg, 0.095 mmol) in acetonitrile (5 mL) was heated in order to insure complete dissolution. The solution was allowed to cool slowly, resulting in the formation of clear, colorless needles of **2**. Concentration of the solution resulted in the precipiation of the compound which was recovered in a 75% yield (40 mg). Anal. Calcd. for C23H18NCl2GaSn: C, 48.66; H, 3.20. Found: C, 47.98; H, 3.15. 1H NMR (acetonitrile-*d*3): = 1.42 (s, 2*J*H-117/119Sn = 30/32 Hz, 3H), 7.60 (dd, 4H), 7.62 (dd, 4H), 7.97 (d, 4H), 8.05 (d, 4H), 8.09 (d, 4H), 8.27 (d, 4H).  119Sn NMR (acetonitrile-*d*3): =  -102.0.

**Synthesis of 3-5**:Compound **1** (50 mg, 0.095 mmol) and the tetraphenylphosphonium halide salt (0.095 mmol) were dissolved in hot acetonitrile (5 mL). Upon cooling to room temperature, tan crystals of **3**-**5** formed. Furthr concentration of the solutions afforded **3**-**5** in 65-80% yields. **3**: Anal. Calcd. for C45H35Cl3PGaSn: C, 60.0; H, 3.9. Found: C, 59.6; H, 3.9. **4**: Anal. Calcd. for C45H35Cl2BrPGaSn: C, 57.1; H, 3.7. Found: C, 56.6; H, 3.8.. **5**: Anal. Calcd. for C45H35Cl2IPGaSn: C, 54.4; H, 3.6. Found: C, 53.8; H, 3.6.

1. . G. Sheldrick, SHELXS-86 Program for Crystal Structure Solution; Institut für Anorganische Chemie, Universität Göttingen: Göttingen, Germany, 1986. [↑](#endnote-ref-2)
2. . G. Sheldrick, SHELXL-97 Program for Crystal Structure Refinement; Institut für Anorganische Chemie, Universität, Göttingen: Göttingen, Germany, 1997. [↑](#endnote-ref-3)
